# Supplementary material for: Electronic health record-based clinical decision support alert for severe sepsis: a randomised evaluation
Source: PubMed Central journal article supplement — BMJ Qual Saf. 2019 Mar 14;28(9):762–8. doi: 10.1136/bmjqs-2018-008765 (PMC6860967; doi:10.1136/bmjqs-2018-008765), 2019-03-14
Supplement: bmjqs-2018-008765supp001.pdf [file bmjqs-2018-008765supp001.pdf]

## Supplement 1

**Alert criteria:** Three or more SIRS criteria plus one or more suspected infection criteria plus one or more organ dysfunction criteria.

| <b>SIRS criteria</b>                | <b>Look back</b> |
|-------------------------------------|------------------|
| Creatinine > 2mg/dL                 | 24 hours         |
| Lactic acid > 1mmol/L               | 24 hours         |
| WBC > 12K/uL or < 4K/uL             | 24 hours         |
| Platelets < 100K/uL                 | 24 hours         |
| Temp > 100.94F or < 96.8F           | 24 hours         |
| Heart rate > 90 beats/min           | 4 hours          |
| Calculated MAP < 70mmHg             | 4 hours          |
| SBP < 90mmHg                        | 4 hours          |
| Respiratory rate > 20/min           | 4 hours          |
| <b>Suspected Infection criteria</b> |                  |
| Blood culture ordered               | 2 midnights      |
| Serum lactate ordered               | 2 midnights      |
| <b>Organ dysfunction criteria</b>   |                  |
| Lactate $\geq$ 3mmol/L              | 24 hours         |
| SBP<90mmHg or MAP <70mmHg           | 4 hours          |
