# Supplementary material for: Electronic health record-based clinical decision support alert for severe sepsis: a randomised evaluation
Source: PubMed Central journal article supplement — BMJ Qual Saf. 2019 Mar 14;28(9):762–8. doi: 10.1136/bmjqs-2018-008765 (PMC6860967; doi:10.1136/bmjqs-2018-008765), 2019-03-14
Supplement: bmjqs-2018-008765supp002.pdf [file bmjqs-2018-008765supp002.pdf]

**Supplement 2: Antibiotic (Anti-infective) definitions**

|                 |                            |                             |                                   |
|-----------------|----------------------------|-----------------------------|-----------------------------------|
| ABELCET         | CLAFORAN                   | LEVOFLOXACIN                | PRIMAXIN IV                       |
| AMBISOME        | CLEOCIN                    | LINCOCIN                    | QUINUPRISTIN-DALFOPRISTIN         |
| AMIKACIN        | CLINDAMYCIN                | LINCOMYCIN                  | ROCEPHIN                          |
| AMPHOTERICIN    | COLISTIMETHATE             | LINEZOLID                   | SIVEXTRO                          |
| AMPICILLIN      | COLY-MYCIN                 | MAXIPIME                    | SULFAMETHOXAZOLE-<br>TRIMETHOPRIM |
| ANIDULAFUNGIN   | CUBICIN                    | MEFOXIN IN DEXTROSE         | SYNERCID                          |
| AVELOX IN NACL  | DALBAVANCIN                | MEROPENEM                   | TAZICEF                           |
| AZACTAM         | DALVANCE                   | MERREM                      | TEDIZOLID                         |
| AZITHROMYCIN    | DAPTOMYCIN                 | METRO I.V.                  | TEFLARO                           |
| AZTREONAM       | DORIBAX                    | METRONIDAZOLE               | TELAVANCIN                        |
| CANCIDAS        | DORIPENEM                  | MICAFUNGIN                  | TICARCILLIN-CLAVULANATE           |
| CASPOFUNGIN     | DOXY-100                   | MINOCIN                     | TIGECYCLINE                       |
| CEFAZOLIN       | DOXYCYCLINE                | MINOCYCLINE                 | TIMENTIN                          |
| CEFEPIME        | DOXYCYCLINE                | MOXIFLOXACIN                | TOBRAMYCIN                        |
| CEFOTAXIME      | ERAXIS                     | MYCAMINE                    | TRIMETHOPRIM-<br>SULFAMETHOXAZOLE |
| CEFOTETAN       | ERTAPENEM                  | NAFCILLIN                   | TYGACIL                           |
| CEFOXITIN       | ERYTHROCIN                 | NOXAFIL                     | UNASYN                            |
| CEFTAROLINE     | ERYTHROMYCIN               | ORBACTIV                    | VANCOMYCIN                        |
| CEFTAZIDIME     | FLUCONAZOLE                | ORITAVANCIN                 | VFEND IV                          |
| CEFTOLOZANE     | FORTAZ                     | OXACILLIN                   | VIBATIV                           |
| CEFTRIAZONE     | GENTAMICIN                 | PENICILLIN G IV<br>INFUSION | VORICONAZOLE                      |
| CEFUROXIME      | IMIPENEM AND<br>CILASTATIN | PFIZERPEN-G                 | ZINACEF                           |
| CHLORAMPHENICOL | INVANZ                     | PIPERACILLIN                | ZITHROMAX                         |
| CIPRO           | KANAMYCIN                  | PIPERACILLIN-<br>TAZOBACTAM | ZOSYN                             |
| CIPROFLOXACIN   | LEVAQUIN                   | POSACONAZOLE                | ZYVOX                             |
