# Supplementary material for: Electronic health record-based clinical decision support alert for severe sepsis: a randomised evaluation
Source: PubMed Central journal article supplement — BMJ Qual Saf. 2019 Mar 14;28(9):762–8. doi: 10.1136/bmjqs-2018-008765 (PMC6860967; doi:10.1136/bmjqs-2018-008765), 2019-03-14
Supplement: bmjqs-2018-008765supp003.pdf [file bmjqs-2018-008765supp003.pdf]

**Supplement 3: Pre-alert compliance**

| <b>% compliant at time of alert</b> | <b>Intervention</b> | <b>Control</b> | <b>Adjusted P value (bonferroni)</b> | <b>Lookback (hours)</b> |
|-------------------------------------|---------------------|----------------|--------------------------------------|-------------------------|
| <b>Lactate ordered</b>              | 23.4                | 28.6           | 0.23                                 | 6                       |
| <b>Blood culture ordered</b>        | 43.2                | 43.8           | 1.00                                 | 48                      |
| <b>Anti-infectives given</b>        | 66.0                | 66.3           | 1.00                                 | 24                      |
| <b>Fluids (any)</b>                 | 29.4                | 31.3           | 1.00                                 | 6                       |
| <b>Fluids (at least 2L)</b>         | 8.9                 | 6.6            | 0.62                                 | 6                       |
